# Functional equivalence of Brn3 POU-domain transcription factors in mouse retinal neurogenesis

Ling Pan<sup>1,\*</sup>, Zhiyong Yang<sup>1,\*</sup>, Liang Feng<sup>1</sup> and Lin Gan<sup>1,2,3,†</sup>

<sup>1</sup>Center for Aging and Developmental Biology, University of Rochester, Rochester, NY 14642, USA

<sup>2</sup>Department of Ophthalmology, University of Rochester, Rochester, NY 14642, USA

<sup>3</sup>Department of Neurobiology and Anatomy, University of Rochester, Rochester, NY 14642, USA

\*These authors contributed equally to this work

†Author for correspondence (e-mail: lin\_gan@urmc.rochester.edu)

Accepted 8 December 2004

Development 132, 703–712

Published by The Company of Biologists 2005

doi:10.1242/dev.01646

## Summary

POU-domain transcription factors play essential roles in cell proliferation and differentiation. Previous studies have shown that targeted deletion of each of the three POU-domain Brn3 factors in mice leads to the developmental failure and apoptosis of a unique set of sensory neurons in retina, dorsal root ganglia, trigeminal ganglia and inner ear. The specific defects associated with the removal of each Brn3 gene closely reflect their characteristic spatiotemporal expression patterns. Nevertheless, it remains elusive whether Brn3 factors are functionally equivalent and act through a common molecular mechanism to regulate the development and survival of these sensory neurons. By knocking-in *Brn3a* (*Brn3a<sup>ki</sup>*) into

the *Brn3b* locus, we showed here that *Brn3a<sup>ki</sup>* was expressed in a spatiotemporal manner identical to that of endogenous *Brn3b*. In addition, *Brn3a<sup>ki</sup>* functionally restored the normal development and survival of retinal ganglion cells (RGCs) in the absence of *Brn3b* and fully reinstated the early developmental expression profiles of *Brn3b* downstream target genes in retina. These results indicate that Brn3 factors are functionally equal and that their unique roles in neurogenesis are determined by the distinctive Brn3 spatiotemporal expression patterns.

Key words: Brn3, POU-domain, Retina, Neurogenesis, Retinal ganglion cells, Transcription factors, Pou4f

## Introduction

A central issue in the development of the vertebrate nervous system is how its vast number of distinct neurons are generated. POU-domain transcription factors play pivotal roles in cell differentiation processes (Wegner et al., 1993). The Class IV POU-domain Brn3 factors Brn3a, Brn3b and Brn3c (Pou4f1, Pou4f2 and Pou4f3, respectively – Mouse Genome Informatics) share a highly conserved DNA-binding POU-domain with ~95% amino acid sequence identity and an ~70% sequence identity in regions outside the POU-domains (Xiang et al., 1995). In vitro DNA-binding assays have shown that all Brn3 proteins bind to the same specific consensus DNA sequences (Gruber et al., 1997; Xiang et al., 1995). Expression studies have revealed that Brn3 genes are expressed in distinct but often overlapping patterns in developing dorsal root and trigeminal ganglia, RGCs, auditory and vestibular neurons, and in selected midbrain nuclei associated with motor and sensory controls (Fedtsova and Turner, 1995; Gerrero et al., 1993; Ninkina et al., 1993; Turner et al., 1994; Xiang, 1998; Xiang et al., 1997a; Xiang et al., 1995; Xiang et al., 1993). It is postulated that Brn3 genes are required for the cell differentiation of these sensory neurons (Turner et al., 1994; Xiang et al., 1993).

To investigate the roles of Brn3 genes, we and others have created targeted mutations in Brn3 genes and have shown that individual null mutations lead to distinct defects in the

development of sensory neurons (Xiang et al., 1997a). Mice carrying *Brn3a*-null mutation suffer from a selective loss of neurons in somatosensory ganglia and in selective brainstem nuclei, display uncoordinated limb movement and impaired suckling, and die shortly after birth (McEvelly et al., 1996; Xiang et al., 1996). A detailed examination of the role of Brn3a in neurogenesis has demonstrated the axonal growth and pathfinding defects in trigeminal and dorsal root neurons prior to their programmed cell death (Eng et al., 2001). Last, *Brn3a* is required for axon pathfinding and target field innervation of spiral and vestibular ganglion neurons in the inner ear (Huang et al., 2001).

In contrast to the studies using *Brn3a* mutants, *Brn3b*-null mutants display a loss of ~70% of RGCs in adult retinal ganglion cell layer (GCL) (Erkman et al., 1996; Gan et al., 1996). Further studies by using *Brn3b-lacZ* and *Brn3b*-AP knock-in mice have shown that *Brn3b* is not required for cell fate specification and migration of RGCs. Rather, *Brn3b* expression is essential for axon growth, pathfinding, fasciculation and survival of RGCs (Gan et al., 1999; Wang et al., 2000). Analysis of RGC axons in postnatal *Brn3b*-null mice also reveals that *Brn3b* is involved in the pathfinding of RGC axons at multiple points along their pathways and in the establishment of topographic order in the superior colliculus (Erkman et al., 2000).

In the third group of Brn3 mutants, *Brn3c*-null mice lack

vestibular and auditory hair cells in the inner ear, are deaf and have impaired balancing abilities (Erkman et al., 1996; Xiang et al., 1997a). Recently, *Brn3c* was shown to be essential for the differentiation of a small number of RGCs (Wang et al., 2002). This finding is exacerbated in *Brn3b* and *Brn3c* double knockout mice, where significantly more RGCs are lost than in either *Brn3b* or *Brn3c* single mutants (Wang et al., 2002).

The unique phenotypes associated with *Brn3* knockouts illustrate that each *Brn3* gene has a great degree of functional specificity. One explanation of their functional uniqueness is that the unique protein sequences of *Brn3* factors could render each characteristic biochemical properties and thus, distinctive transcriptional activities. Conversely, based on their highly conserved POU-domains and identical DNA-binding properties, all *Brn3* factors could also be functionally equivalent in transcriptional activities. The distinctive neuronal defects related to the loss of each *Brn3* gene could simply reflect its characteristic spatiotemporal expression patterns. To test these hypotheses, we perform *in vivo* gene-replacement experiments to investigate whether knocking-in one *Brn3* gene to replace the other can functionally rescue the neuronal defects associated with the loss of the other *Brn3* gene. We demonstrate that targeted replacement of *Brn3b* with *Brn3a* corrects the retinal defects identified in *Brn3b*-null mice. The RGCs expressing *Brn3a<sup>ki</sup>* in the absence of *Brn3b* are able to form fasciculated axons, to generate proper axon projection, and to avoid the fate of programmed cell death. Furthermore, *Brn3a<sup>ki</sup>* expression from the *Brn3b* locus restores the early developmental expression profiles of *Brn3b* downstream target genes. Our results strongly argue for the functional equivalence of *Brn3* transcription factors and imply a shared *Brn3* regulatory pathway in the development of various sensory neurons.

## Materials and methods

### Animals

*Brn3b<sup>lacZ</sup>* and *Brn3b<sup>AP</sup>* knock-in mice were generated by targeted gene disruption as previously described (Gan et al., 1999). A *Brn3a<sup>ki</sup>* knock-in construct was generated with the same 5' and 3' *Brn3b* genomic DNA fragments as those in a *Brn3b<sup>lacZ</sup>* knock-in construct for homologous recombination in embryonic stem (ES) cells (Gan et al., 1999). The DNA fragment containing *Brn3b*-coding regions in two exons and a single intron was replaced with *Brn3a* cDNA sequences containing only the entire open read frame (ORF). In addition, a DNA fragment containing the *lacZ* sequence tag was inserted 3' to *Brn3a* translation terminal codon and was used as a specific *in situ* hybridization probe to monitor the expression of *Brn3a<sup>ki</sup>*. This construct placed the *Brn3a* ORF under the control of *Brn3b* transcriptional regulation. To generate *Brn3b<sup>3a</sup>* knock-in mice, a *NotI*-linearized *Brn3b<sup>3a</sup>* targeting construct was electroporated into AB1 (129S6) embryonic stem (ES) cells (a gift from A. Bradley, Baylor College of Medicine). Nine targeted clones were obtained from a total of 96 G418- and FIAU-resistant ES clones. Targeted clones were confirmed by Southern blotting genotyping. Two targeted ES cell clones were injected into C57BL/6J blastocysts to generate mouse chimeras and heterozygous *Brn3b<sup>3a/+</sup>* mutant mice were generated in 129S6 and C57BL/6J mixed background as previously described (Gan et al., 1999; Gan et al., 1996). Embryos were identified as E0.5 at noon on the day at which vaginal plugs were first observed.

### Histochemistry

To compare retinas and optic nerves in *Brn3b<sup>lacZ/+</sup>*, *Brn3b<sup>AP/lacZ</sup>* and

*Brn3b<sup>3a/lacZ</sup>* mice, eye cups and brain tissues containing optic nerves, optic chiasm and optic tracks from weight- and gender-matched mice at 6 weeks age were paraffin-embedded and sectioned at 10  $\mu$ m. Optic nerves were cut at ~1 mm anterior to the optic chiasm. Sections were de-waxed and stained with Hematoxylin and Eosin. Areas of the optic nerves were photographed and the sizes of optic nerves were computed and compared by Scion Image.

### Immunohistochemistry, *in situ* hybridization, BrdU labeling and X-gal staining

Staged embryo and tissue samples were dissected and immediately fixed in 4% paraformaldehyde. The samples were then embedded and frozen in OCT medium (Tissue-Tek). For immunolabeling, cryosections were cut at 15  $\mu$ m. The working dilutions and sources of antibodies used in this study were: mouse anti-bromodeoxyuridine (BrdU) (1:200, Becton Dickson), mouse anti-*Brn3a* (1:100, Santa Cruz), goat anti-*Brn3b* (1:2,000, Santa Cruz), rabbit anti-phosphohistone 3 (1:400, Santa Cruz) and anti-nonphosphorylated neurofilament H (SMI-32) (1:2,000, Sternberger Monoclonals). Alexa-conjugated secondary antibodies (Molecular Probes) were used at a concentration of 1:400. For *in situ* hybridization experiments, 20  $\mu$ m cryosections were used as previously described (Li and Joyner, 2001).

Detection of  $\beta$ -galactosidase activity was determined by X-gal staining (Gan et al., 1999). Briefly, retinal tissues were fixed in 4% paraformaldehyde in PBS at 4°C for 30 minutes. Whole retinas or 16  $\mu$ m frozen sections were stained overnight at room temperature with 0.1% X-gal, 5 mM potassium ferricyanide, 5 mM potassium ferrocyanide, 2 mM MgCl<sub>2</sub> in PBS. For bromodeoxyuridine (BrdU) (Sigma) pulse-labeling experiments, pregnant females were injected intraperitoneally with 100  $\mu$ g BrdU/gram body weight 1 hour before they were sacrificed. Embryo processing and BrdU labeling were performed as previously described (Mishina et al., 1995).

### Lipophilic dye tracing

For optic nerve labeling, E17.5 embryonic mouse heads were fixed overnight in 4% paraformaldehyde in PBS. After the right eyes were enucleated, crystals of DiI (Molecular Probes) were implanted unilaterally into the optic discs. After incubation at 37°C in PBS containing 0.1% sodium azide for 2 weeks, the brains were dissected. The labeled optic nerves were exposed and visualized with a Nikon fluorescence dissecting microscope.

## Results

### Expression of *Brn3a* and *Brn3b* in developing retina

To better elucidate the roles of *Brn3a* and *Brn3b* in retinal development, we compared their spatiotemporal expression patterns in embryonic retinas. Immunostaining experiments with anti-*Brn3b* first detected *Brn3b* expression in the central retina at E11.5 (Fig. 1A). As retinal development progressed, *Brn3b* expression expanded circumferentially towards peripheral retinal regions, peaking at E12.5 to E15.5 when the majority of RGCs were generated (Fig. 1D,G,J). The retinal expression of *Brn3b* was clearly detected in the migrating RGCs in the neuroblast layer (NBL) and in the post-migration RGCs in the newly formed GCL at the inner surface of the developing retina. Analysis of *Brn3a* expression by anti-*Brn3a* immunolabeling illustrated that *Brn3a* expression was not detectable at E11.5 (Fig. 1B) and that the onset of *Brn3a* expression started 1 day later than that of *Brn3b* at E12.5 (Fig. 1E). Similar to *Brn3b*, *Brn3a* expression was first observed in the central retina and expanded toward the peripheral retina (Fig. 1E,H,K). However, *Brn3a* expression was limited to the

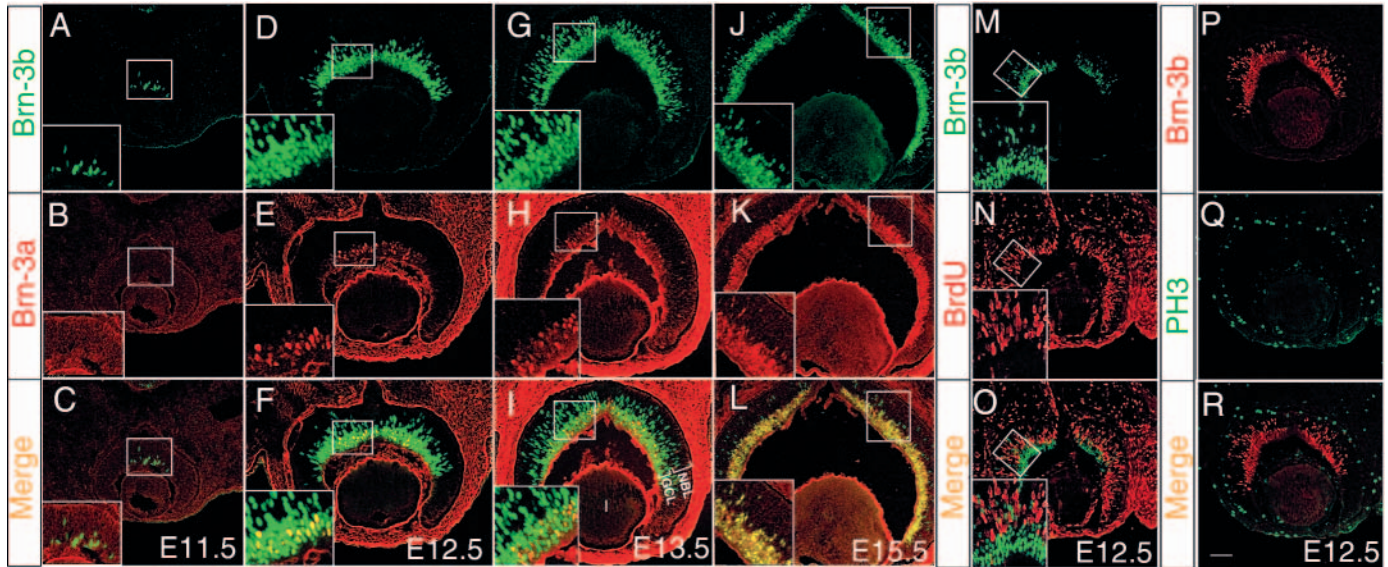

**Fig. 1.** Spatiotemporal expression profiles of Brn3a and Brn3b in developing mouse retinas. (A–L) The expression of Brn3a and Brn3b in RGCs. (A) The onset of Brn3b expression (green) starts at E11.5 in the central retina. (D, G, J) At E12.5 to E15.5, Brn3b expression expands towards the peripheral retina and is detected in cells in the NBL and in post-migration RGCs in the GCL. (B) Brn3a expression (red) is not detected in the retina at E11.5. (E, H, K) The appearance of Brn3a begins at E12.5 and is limited to RGCs in the GCL throughout the development. (C, F, I, L) Overlaid images of Brn3a and Brn3b expression. (M–R) Postmitotic expression of Brn3b in the developing retina. (M, P) Anti-Brn3b labeling shows Brn3b in nuclei of cells in the GCL and the NBL. (N) Anti-BrdU (red) labels the nuclei of proliferating cells at S phase. (O) Merged image of M, N. (Q) Anti-PH3 (green) reveals the nuclei of proliferating cells at M phase. (R) Merged image of P, Q. Inserts showed the enlarged view of the corresponding boxed regions. NBL, neuroblast layer; GCL, ganglion cell layer; l, lens. Scale bar: 100  $\mu$ m.

post-migration RGCs in the GCL where its expression overwhelmingly overlapped with that of Brn3b (inserts in Fig. 1F, I, L). At E15.5, both Brn3a and Brn3b were strongly expressed in the GCL and their prominent expression in RGCs continued in adult retina (Fig. 1L; data not shown).

In mice, most RGC precursors become postmitotic, differentiate and migrate to the GCL at E11 to E18 with a peak at E13 to E15 (Hinds and Hinds, 1974; Young, 1985). The early onset of Brn3b expression in the NBL suggests that Brn3b could play a role in regulating the proliferation of retinal progenitors. To address this possibility and to detect whether Brn3b is expressed in the proliferating retinal progenitors, we analyzed Brn3b expression with respect to cell cycles by using specific cell cycle markers at E12.5 when both Brn3b-positive and proliferating progenitor cells were readily detectable. Retinal sections from BrdU-treated wild-type embryos were double-immunolabeled with anti-Brn3b and anti-BrdU as the S-phase or anti-phospho-histone 3 Ser10 (PH3) as the M-phase markers for proliferating cells. As shown in Fig. 1N, immunolabeling with anti-BrdU revealed the proliferating progenitors at S phase throughout E12.5 retina and the adjacent tissues. Anti-Brn3b showed labeled cells in both the NBL and the GCL (Fig. 1M). Double-immunolabeling images illustrated that Brn3b-positive cells did not colocalize with BrdU-positive cells (Fig. 1O). Similarly, double-immunolabeling with anti-Brn3b and anti-PH3 revealed no Brn3b expression in cells at M phase (Fig. 1P–R). Thus, the above results indicate that Brn3b is expressed exclusively in postmitotic retinal cells and are in agreement with previous expression studies of Brn3b in E15.5 retina (Trieu et al., 1999). We have previously shown that the loss of *Brn3b* does not affect the initial differentiation

or the migration of RGCs to the GCL (Gan et al., 1999). The postmitotic expression of Brn3b indicates that Brn3b is unlikely to play a direct role in regulating the proliferation of retinal progenitors and further confirms our earlier findings that Brn3b executes its late role in regulating the terminal differentiation events of RGCs.

Previously, studies of adult retinas have shown that the *Brn3b*-null mutation leads to the reduced retinal expression of *Brn3a* (Gan et al., 1996). To test if the loss of *Brn3a* expression is caused by *Brn3b*-null mutation rather than the apoptosis of RGCs, we asked whether the downregulation of *Brn3a* occurs prior to the onset of RGC apoptosis in developing *Brn3b*-null retinas. In situ hybridization of wild-type retinas showed the onset of *Brn3a* and *Brn3b* expression at E12.5 and E11.5, respectively (Fig. 2A, B). In *Brn3b*-null retinas, *Brn3a* expression was greatly reduced starting at E12.5 (Fig. 2C). As the apoptosis of 70% *Brn3b*-null RGCs does not start until E14.5 in *Brn3b*-null mice (Gan et al., 1999; Xiang, 1998), downregulation of *Brn3a* is unlikely to be due to the loss of RGCs. Rather, the initiation of *Brn3a* expression in normal retina depends on *Brn3b* expression and the loss of *Brn3b* directly causes the decreased *Brn3a* expression.

### Expression of *Brn3a<sup>ki</sup>* in developing retina

We have previously shown that *lacZ* and *AP* knock-in reporters in the *Brn3b* locus are expressed in a spatiotemporal manner identical to that of endogenous *Brn3b* (Gan et al., 1999). To verify whether the expression of *Brn3a<sup>ki</sup>* recapitulates that of endogenous Brn3, we compared the expression of *Brn3a<sup>ki</sup>* and *Brn3b* in *Brn3b<sup>3a/+</sup>* retinas. Compared with the late onset of endogenous *Brn3a* expression detected by *Brn3a* 3' UTR probe

in the GCL of *Brn3b*<sup>3a/+</sup> retina (Fig. 2E), the *lacZ* probe detected *Brn3a*<sup>ki</sup> expression at E11.5 in the NBL and GCL, which resembled the spatiotemporal expression patterns of *Brn3b* (Fig. 2B,F). Immunolabeling with Brn3a antibody demonstrated that the expression of Brn3a<sup>ki</sup> started at E11.5 and was clearly detectable in cells of the NBL and the GCL (Fig. 2G). Double-immunolabeling of Brn3a and Brn3b revealed completely overlapping expression patterns of Brn3a

and endogenous Brn3b (insets, Fig. 2G-I). Thus, by using the knock-in approach, we were able to express Brn3a in all Brn3b-expressing RGCs and in the same spatiotemporal manners as those of Brn3b.

### Absence of retinal defects of in adult *Brn3b*<sup>3a</sup> knock-in mice

To detect the effect of *Brn3a*<sup>ki</sup> on retinal development in *Brn3b*-null mice, we examined the potential defects in retinal structures and in RGC number and properties. Hematoxylin and eosin staining of retinal structure and X-Gal staining of nuclear Brn3b-*lacZ* activity (as the specific marker for all RGCs) showed a loss of ~70% RGCs in the GCL of *Brn3b*<sup>AP/lacZ</sup> retina in mice 6 weeks of age (Fig. 3B,E). Interestingly, the RGC number and the overall structure were indistinguishable in *Brn3b*<sup>3a/lacZ</sup> and wild-type or *Brn3b*<sup>lacZ/+</sup> retinas (compare Fig. 3A with 3C, and 3D with 3F). As another measure to detect the changes in RGCs, we immunolabeled retinas with mouse monoclonal antibody SMI-32, which predominantly labels the axons of large RGCs (Nixon et al., 1989). *Brn3b*<sup>AP/lacZ</sup> retinas showed significantly fewer and less fasciculated axon bundles projecting into the optic disc (OD) (Fig. 3H). Staining of *Brn3b*<sup>3a/lacZ</sup> (Fig. 3I) and wild-type or *Brn3b*<sup>lacZ/+</sup> (Fig. 3G)

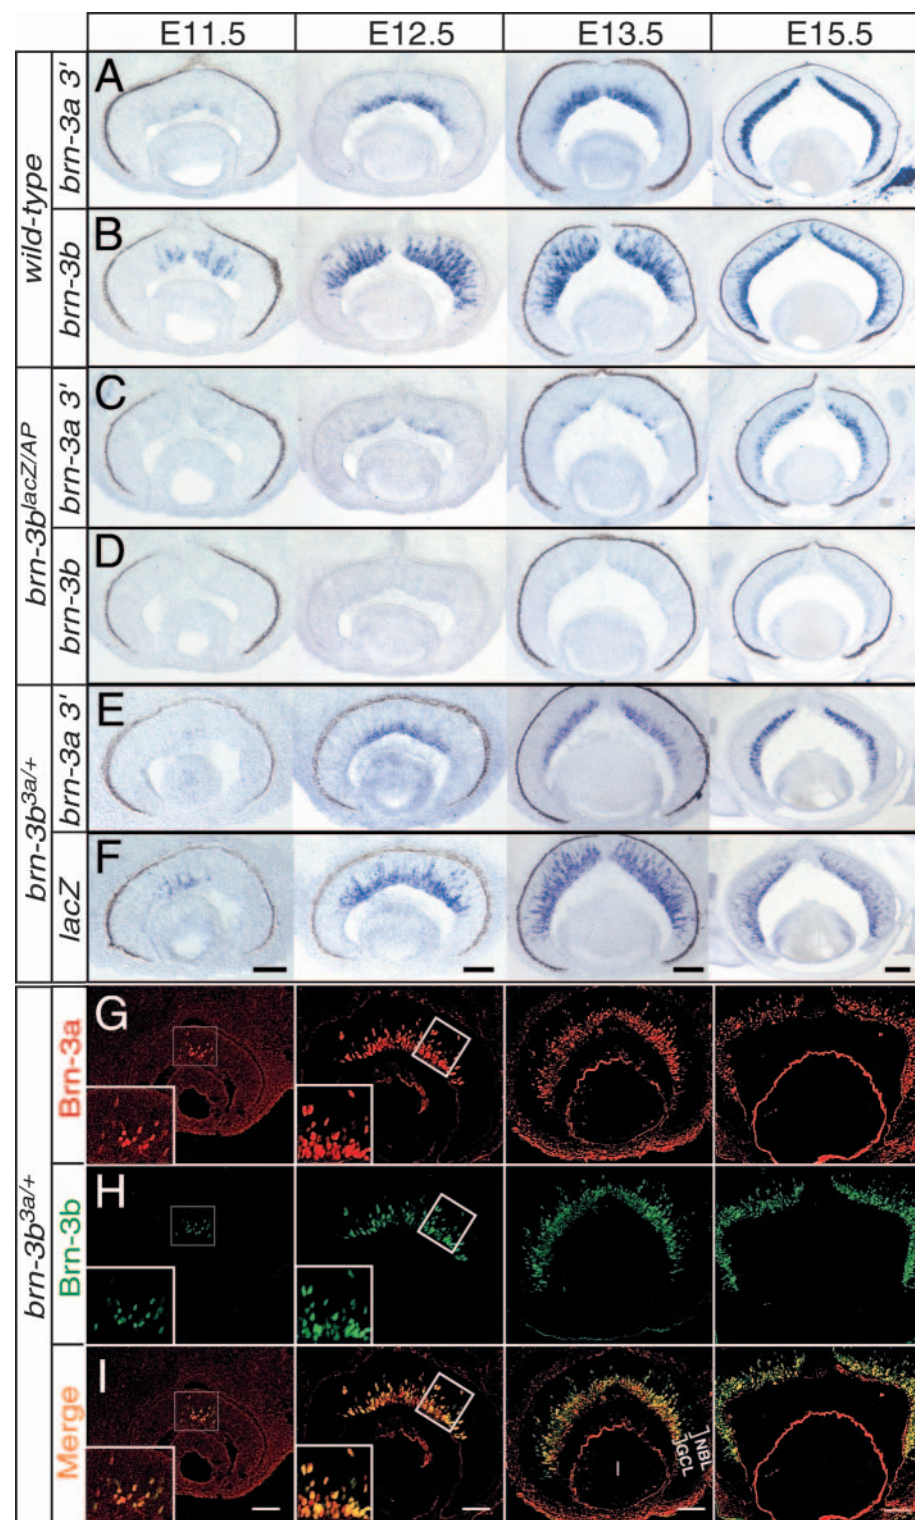

**Fig. 2.** Downregulation of *Brn3a* expression in *Brn3b*-null retinas and co-localization of Brn3a and Brn3b in heterozygous *Brn3b*<sup>3a/+</sup> retinas. (A-F) In situ hybridization using *Brn3b*, *Brn3a* 3'UTR and *lacZ* probes to show the expression patterns of *Brn3b*, *Brn3a* and *Brn3a*<sup>ki</sup> mRNA in E11.5-15.5 retinas. (A) Expression of endogenous *Brn3a* in wild-type mice. (B) *Brn3b* expression in wild-type mice. (C) Reduced expression of *Brn3a* in *Brn3b*-null retinas. (D) Absence of *Brn3b* mRNA in *Brn3b*-null retinas. (E) Expression of endogenous *Brn3a* in *Brn3b*<sup>3a/+</sup> retinas. (F) Onset of *Brn3a*<sup>ki</sup> expression at E11.5 and the expression of *Brn3a*<sup>ki</sup> mRNA in the GCL and the NBL of *Brn3b*<sup>3a/+</sup> retinas. (G-I) Immunolabeling of *Brn3b*<sup>3a/+</sup> retinas at E11.5-15.5 with anti-Brn3a (red) and anti-Brn3b (green). (G) Detection of Brn3a protein in *Brn3b*<sup>3a/+</sup> retinas in the NBL and the GCL. (H) Brn3b expression in *Brn3b*<sup>3a/+</sup> retinas in the NBL and the GCL. (I) Complete overlap of Brn3a and Brn3b expression in cells in the NBL and the GCL. Insets show the enlarged view of the corresponding boxed regions and revealed overlap of Brn3b and Brn3a. NBL, neuroblast layer; GCL, ganglion cell layer; l, lens. Scale bar: 100 μm.

retinas revealed similarly dense and fasciculated RGC axons. RGCs are the only output retinal neurons whose axons exit the eye to form the optic nerve with each RGC contributing a single axon to the optic nerve. We examined the optic nerves of wild-type, *Brn3b<sup>lacZ/AP</sup>* and *Brn3b<sup>3a/lacZ</sup>* mice as an alternative measurement of RGC numbers. When compared with those of wild-type or *Brn3b<sup>lacZ/+</sup>* (Fig. 3J,M), the optic nerves of *Brn3b<sup>lacZ/AP</sup>* (Fig. 3K,N) were greatly reduced in the cross-sectional area ( $12.7 \pm 4.6\%$  of wild-type,  $n=10$ ). Conversely, the expression of a single copy of *Brn3a<sup>ki</sup>* (Fig. 3L,O) was sufficient to restore normal optic nerve size to a level comparable with those of wild-type mice ( $85.2 \pm 6.6\%$  of wild-type,  $n=9$ ). These data indicate that the knock-in of *Brn3a* into *Brn3b* locus is capable of rescuing the defects in retinal structure and RGC number of *Brn3b*-null retinas.

### Restoration of proper RGC axon pathfinding and survival by *Brn3a<sup>ki</sup>* expression

To determine if *Brn3a<sup>ki</sup>* can restore the viability of *Brn3b*-null RGCs, we isolated retinas from E13.5 to P0 and compared the RGC survival rate in *Brn3b<sup>lacZ/+</sup>*, *Brn3b<sup>lacZ/AP</sup>* and *Brn3b<sup>lacZ/3a</sup>* mice. X-Gal staining of retinal sections from all three mice at E13.5 showed comparable *lacZ*-positive RGCs in the NBL and GCL (Fig. 4A-C), indicating that the generation and migration of RGCs remain unchanged in all three mice. At E15.5, when the majority of *Brn3b-lacZ*-positive RGCs were generated and densely packed in the GCL of normal retina (Fig. 4D), the *lacZ*-positive RGCs in *Brn3b*-null retina began to show signs of RGC loss from programmed cell death (Fig. 4E). At E17.5, the loss of RGCs from apoptosis in *Brn3b<sup>lacZ/AP</sup>* retina accelerated and propagated from central to peripheral retina (compare Fig. 4G with 4H). At birth, in contrast to the strong X-Gal-stained GCL in *Brn3b<sup>lacZ/+</sup>* retina (Fig. 4J), the weak *lacZ* activities of *Brn3b<sup>lacZ/AP</sup>* retina demonstrated that only a small number of *Brn3b-lacZ*-positive RGCs survived (Fig. 4K). On the contrary, no overt difference was observed in the GCL of *Brn3b<sup>lacZ/3a</sup>* and

wild-type or *Brn3b<sup>lacZ/+</sup>* mice throughout the developmental stages (compare Fig. 4A,D,G,I with 4C,F,I,L, respectively). Thus, the replacement of *Brn3b* with *Brn3a* cDNA enables the *Brn3b*-null RGCs to survive during retinal development and form the GCL with a ganglion cell density similar to that of wild-type mice.

In order to test whether *Brn3a<sup>ki</sup>* restores the normal pathfinding process of RGCs, we examined the growth and guidance of RGC axons at major choice points within retina and along the central visual pathways. In *Brn3b*-null retina, the majority of RGC axons failed to fasciculate and were unable to reach the OD (Erkman et al., 2000; Gan et al., 1999). As seen in Fig. 3G,I, a similar number of fasciculated axon bundles from RGCs of *Brn3b<sup>3a/lacZ</sup>* and wild-type or *Brn3b<sup>lacZ/+</sup>* retina reached the OD, implying that the expression of *Brn3a<sup>ki</sup>* prevented the early intraretinal pathfinding defects of RGC axons in *Brn3b*-null mice.

For animals with binocular vision, the RGC axons from different retinal regions segregate at the optic chiasm to form the contralateral and ipsilateral visual pathways (Fig. 5A). In mice, the ipsilaterally projected axons arise from the ventrotemporal retina and amount to  $\sim 3\%$  of total RGC axons. As shown in Fig. 5B, anterograde DiI labeling of wild-type mice at E17.5, when the segregation of RGC axons is nearly completed, revealed that a majority of RGC axons projected contralaterally with a small percentage of axons projecting into the ipsilateral pathway. In *Brn3b<sup>AP/lacZ</sup>* mice, although a large proportion of RGC axons formed the contralateral optic tract, an abnormally large proportion of axons exhibited severe pathfinding defects at the optic chiasm and projected into ipsilateral optic track or into the optic nerve of the opposite eye (Fig. 5C). Conversely, no apparent pathfinding defects were identified at the optic chiasm of *Brn3b<sup>3a/3a</sup>* mice ( $n=4$ ) (Fig. 5D), indicating that *Brn3a<sup>ki</sup>* fully substitutes *Brn3b* in regulating the pathfinding decision of RGC axons.

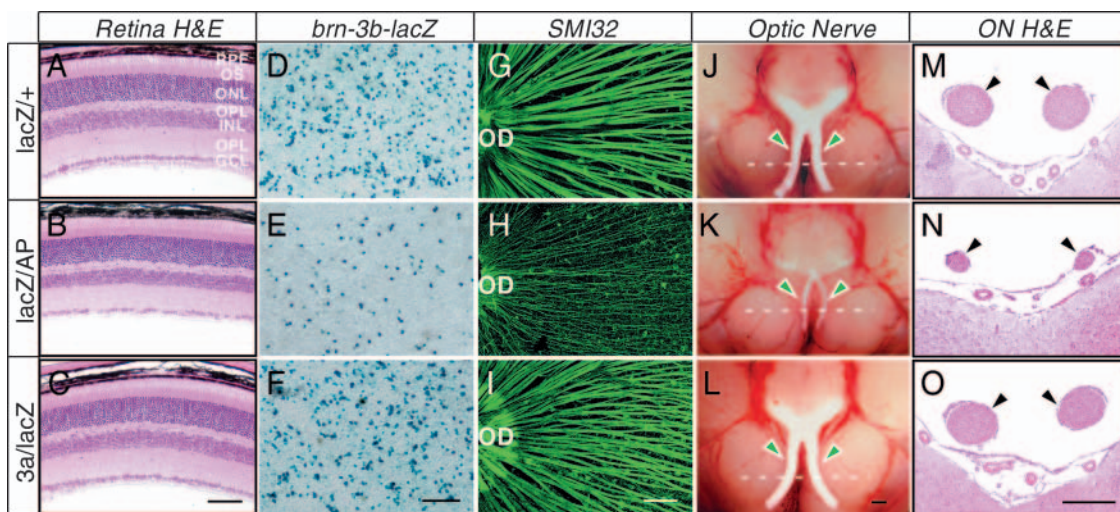

**Fig. 3.** Rescue of retinal defects in adult *Brn3b*-null mice by *Brn3a* knock-in in *Brn3b* locus. Top, middle and bottom panels are representative of wild-type (*Brn3b<sup>lacZ/+</sup>*), *Brn3b<sup>lacZ/AP</sup>* mutant and *Brn3b<sup>3a/lacZ</sup>* mice, respectively. (A-C) Hematoxylin and Eosin staining of the retinal structure. (D-F) X-Gal staining of *Brn3b-lacZ*-positive RGCs. (G-I) SMI32 immunostaining of neurofilament. (J-L) Whole-mount optic nerves and tracks. (M-O) Hematoxylin and Eosin staining of optic nerve cross-sections cut at the broken lines in J-L. Arrowheads indicate optic nerves. RPE, retinal pigmented epithelium; OS, outer segment; ONL, outer nuclear layer; OPL, outer plexiform layer; INL, inner nuclear layer; IPL, inner plexiform layer; GCL, ganglion cell layer. Scale bars: 100  $\mu$ m in A-I; 300  $\mu$ m in J-O.

**Fig. 4.** Absence of programmed cell death of *Brn3b*-null RGCs in *Brn3a<sup>ki</sup>* knock-in mice during embryonic development. Cryosections of retinas at E13.5 to P0 were stained with X-Gal to reveal the RGCs by the expression of *Brn3b-lacZ* reporter gene at *Brn3b* locus. (A,D,G,J) Control heterozygous *Brn3b<sup>lacZ/+</sup>* mice. During retinal development, RGCs are generated and remained in the GCL. (B,E,H,K) *Brn3b<sup>lacZ/AP</sup>* mice. The *lacZ*-expressing RGCs were initially formed normally in the GCL (E) but a majority of them degenerated before birth (E,H,K). (C,F,I,L) *Brn3b<sup>3a/lacZ</sup>* mice. Replacement of *Brn3b* with *Brn3a<sup>ki</sup>* prevents the apoptosis of *Brn3b*-null RGCs marked by the strong X-Gal staining in the GCL. RPE, retinal pigmented epithelium; NBL, neuroblast layer; GCL, ganglion cell layer; l, lens. Scale bar: 100  $\mu$ m.

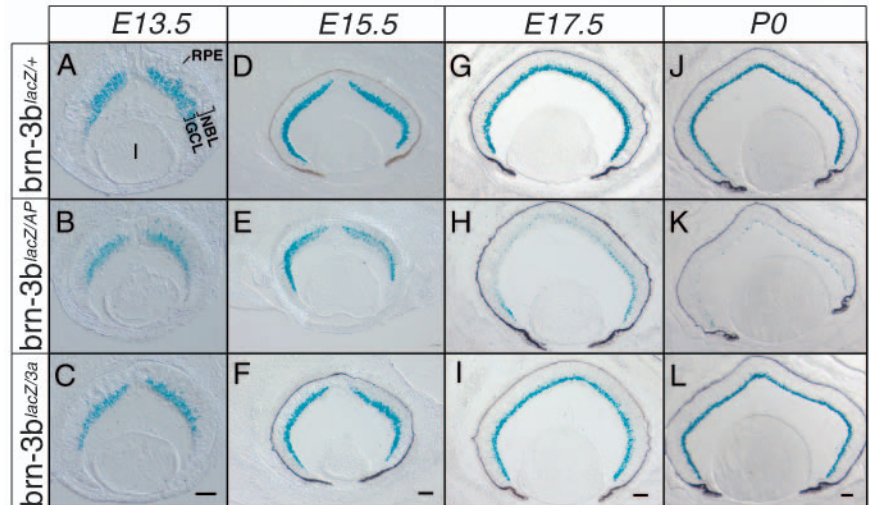

### Activation of *Brn3b* downstream target genes by *Brn3a<sup>ki</sup>*

*Brn3b* probably executes its roles in RGCs by regulating the expression of its downstream target genes. Many *Brn3b* downstream target genes have been identified by representational difference analysis (Erkman et al., 2000; Mu et al., 2004), cDNA microarrays (Mu et al., 2004) and in situ hybridization screening (Z.Y. and L.G., unpublished). They include the transcription factor genes *Brn3a*, *Irx4* and *Irx6* (homeodomain), *Ablim* (LIM-domain), *Gfi1* and *Gli1* (zinc-finger), *Isl2* (LIM-homeodomain), *Olf1* (bHLH), and *Dlx1* and *Dlx2* (homeodomain). Some of these factors have known or postulated roles in retinal development. *Ablim* and *Irx4* have previously been reported to regulate RGC axon pathfinding (Erkman et al., 2000; Jin et al., 2003). *Shh* is essential for the formation of the optic disc and the optic nerve (Dakubo et al., 2003). *Gap43* and *L1* NCAM are associated with RGC axon guidance (Demyanenko and Maness, 2003; Zhang et al., 2000).

To test whether *Brn3a* and *Brn3b* share the identical transcription activities, as well as to determine whether *Brn3a<sup>ki</sup>* rescues the RGC defects by restoring the RGC expression of *Brn3b* downstream target genes, we compared the expression

of these genes in E14.5 retinal sections of wild-type, *Brn3b<sup>lacZ/AP</sup>* and *Brn3b<sup>3a/3a</sup>* embryos. The control *Brn3b* probe confirmed the absence of *Brn3b* expression in *Brn3b<sup>lacZ/AP</sup>* and *Brn3b<sup>3a/3a</sup>* retinas (Fig. 6A). *Brn3a* ORF probe detected the reduced expression of endogenous *Brn3a* in *Brn3b<sup>lacZ/AP</sup>* retina and *Brn3b*-like expression pattern of *Brn3a<sup>ki</sup>* in *Brn3b<sup>3a/3a</sup>* retina (Fig. 6B). Compared with wild-type controls, loss of *Brn3b* in *Brn3b<sup>lacZ/AP</sup>* mice resulted in the downregulation of *Brn3a*, *Irx2*, *Irx6*, *Ablim*, *Gfi1*, *Gli1*, *Isl2*, *Olf1*, *L1*, *Gap43*, *Shh* and *Hermes* (*Rbpms* – Mouse Genome Informatics) (Fig. 6C–D, G–P) and the upregulation of *Dlx1* and *Dlx2* expression (Fig. 6E,F). When retinas from *Brn3b<sup>3a/3a</sup>* knock-in mice were examined, the expression levels of all of above genes were restored to those observed in wild-type retinas (Fig. 6C–P). The expression analyses demonstrate the identical ability for *Brn3a* and *Brn3b* to activate or suppress in RGCs the expression of *Brn3b* downstream genes and support the notion that rescue of *Brn3b*-null phenotypes by *Brn3a<sup>ki</sup>* is achieved by restoring the expression of *Brn3b* downstream genes. Furthermore, *Brn3a<sup>ki</sup>* expression in *Brn3b<sup>3a/3a</sup>* retina lead to the activation of endogenous *Brn3a* expression (Fig. 6C), implying the presence of positive feedback regulation of *Brn3a* expression in the developing retina.

**Fig. 5.** Normal retinal axon projections in *Brn3b<sup>3a/3a</sup>* knock-in mice. Lipophilic dye tracings of the proximal visual pathway in E17.5 mice. (A) Schematic view of the visual system at the ventral surface of the brain. Anterior is towards the top, posterior towards the bottom. Contralateral pathway is shown in red and ipsilateral pathway in blue. The area within the broken lines is imaged with a Nikon fluorescent dissecting microscope. (B) Wild-type mouse. The majority of axons cross the optic chiasm towards the contralateral pathway. Certain axons from ventrotemporal quadrant of the retina do not cross the optic chiasm and form the ipsilateral projection pathway. (C) *Brn3b*-null mouse. Abnormally high percentage of axon fibers travel towards the ipsilateral optic tract and alongside the left optic nerve to the left eye. (D) *Brn3b<sup>3a/3a</sup>* knock-in mouse. Normal axon projection pattern is restored by *Brn3a<sup>ki</sup>* expression in the absence of *Brn3b*. ON, optic nerve; OT, optic tract; Ipsi, ipsilateral projection; Contra, contralateral projection. Asterisk indicates the optic chiasm. Scale bar: 200  $\mu$ m.

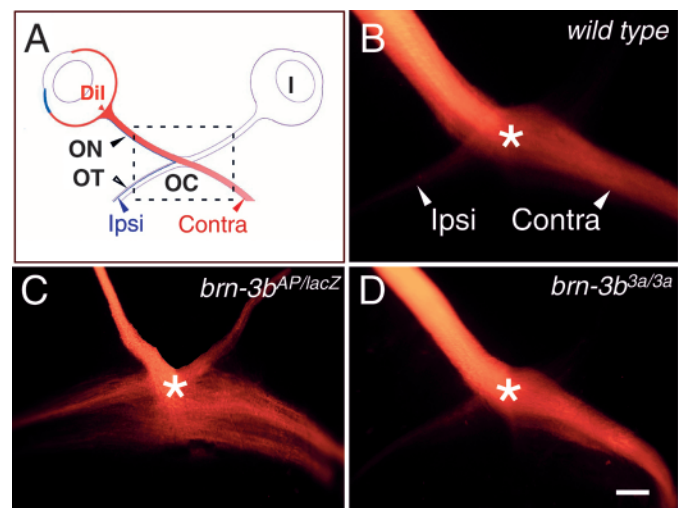

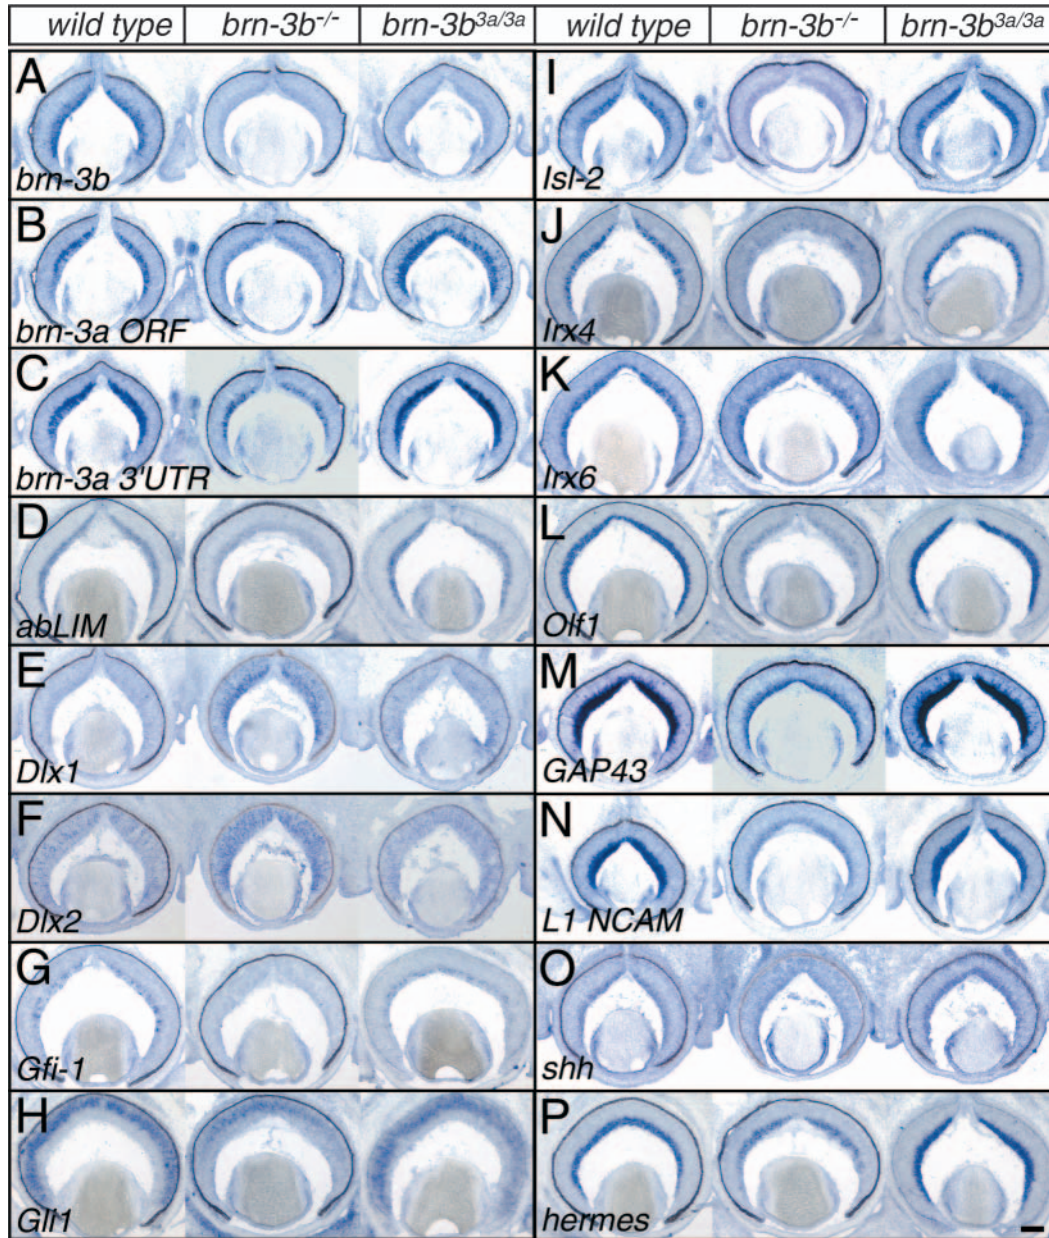

**Fig. 6.** Restoration of *Brn3b* downstream target genes in retinas at E14.5 by *Brn3a<sup>ki</sup>* expression. For each in situ hybridization set of retinal sections at E14.5, left, middle and right panels represent wild-type control, *Brn3b<sup>AP/lacZ</sup>* mutant and *Brn3b<sup>3a/3a</sup>* knock-in, respectively. (A) Control *Brn3b* probe shows the absence of *Brn3b* expression in *Brn3b<sup>AP/lacZ</sup>* and *Brn3b<sup>3a/3a</sup>* retinas. (B) *Brn3a* ORF probe detects the endogenous and ectopic *Brn3a* expression. Expression of the following genes is downregulated in *Brn3b<sup>AP/lacZ</sup>* mice but is restored by *Brn3a<sup>ki</sup>* expression: (C) endogenous *Brn3a*, (D) *Ablim*, (G) *Gfi1*, (H) *Gli1*, (I) *Isl2*, (J) *Irx4*, (K) *Irx6*, (L) *Olf1*, (M) *Gap43*, (N) *L1*, (O) *Shh* and (P) *Hermes*. Conversely, *Dlx1* (E) and *Dlx2* (F) expression is upregulated in the absence of *Brn3b* but restored to near-normal levels in *Brn3b<sup>3a/3a</sup>* knock-in retina. Scale bar: 100  $\mu$ m.

## Discussion

In this report, we have generated *Brn3b<sup>3a</sup>* knock-in mice that express *Brn3a<sup>ki</sup>* in a spatiotemporal pattern identical to that of endogenous *Brn3b*. Our analyses of RGC development in *Brn3b<sup>3a/3a</sup>* mice demonstrate that knocking-in *Brn3a* in the *Brn3b* locus is sufficient to rescue the RGC defects previously identified in the *Brn3b*-null mice. The expression of *Brn3a<sup>ki</sup>* corrects the RGC axon pathfinding errors within retina and along the visual pathway that are associated with the loss of *Brn3b*. In addition, in the presence of *Brn3a<sup>ki</sup>*, *Brn3b*-null RGCs do not undergo the programmed cell death. Furthermore, we present the evidence that *Brn3a<sup>ki</sup>* expression in the absence of *Brn3b* restores the early developmental expression profiles of previously reported *Brn3b* downstream target genes. Though further studies will be required to verify the phenotypic rescue in the physiological properties of RGCs and their target

neurons in the brain, our data strongly argue that *Brn3* transcription factors are functionally equivalent in regulating terminal differentiation genes during RGC development and suggest that a conserved *Brn3* pathway could be present in the development and survival of various neuronal cell types.

### Functional equivalency of *Brn3* factors

The highly conserved *Brn3* factors share a significantly high sequence homology, especially in the functionally important POU-domains and bind to the identical DNA sequences. Though the targeted deletion of each *Brn3* gene results in unique defects in neuronal development, there is a tight correlation of *Brn3* spatiotemporal expression patterns and their knockout phenotypes. In the developing retina, though the expression of *Brn3a* and *Brn3c* in RGCs mostly overlaps with that of *Brn3b*, a comparison of temporal expression profiles of

Brn3 genes shows that *Brn3b* is expressed in retina 1 day earlier than *Brn3a* and *Brn3c*. Deletion of *Brn3b* causes the loss of RGCs and the downregulation of *Brn3a* and *Brn3c* expression in RGCs (Gan et al., 1996). The downregulation of *Brn3a* is detected at E12.5 and before the onset of RGCs apoptosis after E14.5 in *Brn3b*-null mice, suggesting that in a majority of RGCs, *Brn3b* acts upstream to activate the expression of *Brn3a*. Thus, it is probable that the loss of these RGCs in *Brn3b* knockout mice is due to the requirement for early *Brn3b* expression during RGC development.

Similarly, the specific neuronal defects observed in *Brn3a*-null mice are closely linked to its distinctive expression in these neurons. In developing dorsal root ganglia, *Brn3a* expression starts at E9.5 and precedes those of *Brn3b* and *Brn3c* (McEvelly et al., 1996). *Brn3a* is also the only Brn3 family member to express in red nuclei and knockout of *Brn3a* specifically leads to apoptosis of neurons in both dorsal root ganglia and red nuclei (Xiang et al., 1996). In addition, in the caudal region of the inferior olivary nucleus, *Brn3a* and *Brn3b* are co-expressed in neurons at the ventral boundaries and *Brn3a* expression is further extended more dorsally. Removal of *Brn3a* in the knockout mice results in the loss of *Brn3a*-expressing neurons in regions dorsal to the ventral boundaries but not at the ventral boundaries where the expression of *Brn3a* and *Brn3b* overlaps (Xiang et al., 1996).

In inner ear, although both *Brn3a* and *Brn3b* are co-expressed in vestibular and cochlear ganglion cells of the developing inner ear, *Brn3a* expression starts at E9 and persists throughout development, and *Brn3b* expression does not start until E12.5. In agreement with their expression patterns, loss of *Brn3a* results in the degeneration of spiral and vestibular ganglion cells and the absence of *Brn3b* expression in these cells (Huang et al., 2001). Likewise, *Brn3c* is the only Brn3 gene to express in inner ear hair cells and the loss of hair cells in *Brn3c* knockout mice also reflects its unique spatial expression pattern (Xiang et al., 1997a).

In our present study, we express *Brn3a* in all *Brn3b*-expressing cells at a physiological level comparable with that of endogenous *Brn3b* by choosing a knock-in approach to replace *Brn3b*-coding regions with *Brn3a* cDNA. We have shown that *Brn3a<sup>ki</sup>* can fully replace Brn3b and rescue the retinal defects associated with *Brn3b*-null mutation. Our in vivo studies demonstrate that Brn3 genes are functionally equivalent and that their distinctive roles in development are determined by their unique expression profiles. Consistent with our results, gain-of-function studies in chicken retinas have shown that all Brn3 proteins play a similar role to promote the development of RGCs (Liu et al., 2000). However, our findings appear different from other published in vitro studies. Those studies as such have shown that both Brn3a and Brn3b activate an iNOS promoter in BHK-21 fibroblast cells (Gay et al., 1998). However, the two genes exhibit antagonistic effects on the transcriptional regulation of human papilloma virus (HPV) type 16 and 18 E6 and E7 genes in cell lines of cervical origin (Ndisang et al., 1998) and on in vitro differentiation of ND7 cells (Smith et al., 1997). All of these in vitro studies are performed in culture of different cell lines and, sometimes, in lines derived from cells with no known Brn3 expression or function. In addition, these transactivation experiments have used strong viral promoters that express Brn3 factors at levels significantly higher than normal physiological concentrations. Thus, it is rather difficult

to properly compare and to decipher the precise in vivo role of each Brn3 factor under such in vitro conditions.

As Brn3 factors are often expressed in the same cells, if Brn3 factors indeed possess unique biochemical properties and function antagonistically, disruption of the proper equilibriums of Brn3 factors within the same cells could have a detrimental effect on their development and survival. However, previously published studies have failed to show any developmental and survival defects in mice heterozygous for any of the three Brn3 mutations (Erkman et al., 1996; Gan et al., 1999; Gan et al., 1996; McEvelly et al., 1996; Xiang et al., 1997b; Xiang et al., 1996). Recent studies have shown that the autoregulation of *Brn3a* can compensate for the loss of one allele by increasing transcription from the remaining allele in trigeminal and dorsal root ganglia (Trieu et al., 2003). Such dose compensation mechanisms in retina have not been reported yet. Additional in vivo gene replacement experiments of Brn3 are needed to demonstrate whether the biochemical roles of all Brn3 factors are identical. Nonetheless, our results clearly provide the first in vivo evidence to support this theory.

### Brn3b regulatory pathway in the development and survival of retinal ganglion cells

The postmitotic expression of Brn3b in retina is consistent with our previous findings that Brn3b acts downstream of bHLH-class transcription factor Math5 to regulate the terminal differentiation and survival of RGCs (Gan et al., 1999; Wang et al., 2001; Yang et al., 2003). In *Brn3b*-null mice, RGCs fail to project axons properly and die of programmed cell death. Brn3b probably controls these complicated processes by modulating the expression of genes essential for RGC differentiation and survival. Recently, a cDNA microarray analysis of gene expression profiles in wild-type and *Brn3b*-null retinas demonstrated that Brn3b regulates the expression of discrete sets of genes, including genes encoding transcription factors, secreted signaling molecules, and proteins for neuron integrity and function (Mu et al., 2004). Similarly, we have shown in this study that the expression of additional genes with known roles in axon growth and pathfinding are indeed altered in *Brn3b*-null retina.

It remains unclear whether the *Brn3b* downstream targets are primarily regulated by Brn3b or Brn3a in retina. *Brn3b*-null mutation leads to the diminished expression of *Brn3a* (Gan et al., 1996). A comparable phenomenon is observed in *Brn3a*-null mice, where *Brn3b* expression is drastically reduced in trigeminal, dorsal root, spiral and vestibular ganglia (Huang et al., 2001; McEvelly et al., 1996; Xiang et al., 1996). The lack of overt retinal phenotypes in *Brn3a*-null mice (McEvelly et al., 1996; Xiang et al., 1996) and the restoration of *Brn3b* downstream target gene expression by *Brn3a<sup>ki</sup>* suggest that both Brn3a and Brn3b play equivalent roles to regulate these genes. Interestingly, ectopic expression of *Brn3a<sup>ki</sup>* in Brn3b-deficient retina also activates the expression of endogenous *Brn3a*, suggesting a mutual, positive feedback regulation of *Brn3a* and *Brn3b* genes. Activation of *Brn3b* probably leads to the activation and maintenance of *Brn3a* and *Brn3b* expression in RGCs. Vice versa, initial activation of *Brn3a* could result in the activation and maintenance of *Brn3a* and *Brn3b* expression in other sensory neurons. The exact role of such feedback control in Brn3 gene expression is unclear. Nevertheless, as Brn3 factors function downstream of the initial differentiation



events initiated by bHLH transcription factors, such a positive feedback mechanism would allow the irreversible activation of terminal differentiation programs of sensory neurons.

We thank Dr Valerie A. Wallace for mouse *Shh* probe, and Drs William Klein, Carl Pinkert and Jennifer Anstey for critical reading of this manuscript. We also thank other members of the Gan Laboratory for helpful discussions and technical assistance. This work was supported by NIH-NEI grants EY013426 and EY015551, and by the Kilian and Caroline F. Schmitt Program on Integrative Brain Research.

## References

- Dakubo, G. D., Wang, Y. P., Mazerolle, C., Campsall, K., McMahon, A. P. and Wallace, V. A.** (2003). Retinal ganglion cell-derived sonic hedgehog signaling is required for optic disc and stalk neuroepithelial cell development. *Development* **130**, 2967-2980.
- Demyanenko, G. P. and Maness, P. F.** (2003). The L1 cell adhesion molecule is essential for topographic mapping of retinal axons. *J. Neurosci.* **23**, 530-538.
- Eng, S. R., Gratwick, K., Rhee, J. M., Fedtsova, N., Gan, L. and Turner, E. E.** (2001). Defects in sensory axon growth precede neuronal death in Brn3a-deficient mice. *J. Neurosci.* **21**, 541-549.
- Erkman, L., McEvelly, R. J., Luo, L., Ryan, A. K., Hooshmand, F., O'Connell, S. M., Keithley, E. M., Rapaport, D. H., Ryan, A. F. and Rosenfeld, M. G.** (1996). Role of transcription factors Brn-3.1 and Brn-3.2 in auditory and visual system development. *Nature* **381**, 603-606.
- Erkman, L., Yates, P. A., McLaughlin, T., McEvelly, R. J., Whisenhunt, T., O'Connell, S. M., Krones, A. L., Kirby, M. A., Rapaport, D. H., Bermingham, J. R. et al.** (2000). A POU domain transcription factor-dependent program regulates axon pathfinding in the vertebrate visual system. *Neuron* **28**, 779-792.
- Fedtsova, N. G. and Turner, E. E.** (1995). Brn-3.0 expression identifies early post-mitotic CNS neurons and sensory neural precursors. *Mech. Dev.* **53**, 291-304.
- Gan, L., Wang, S. W., Huang, Z. and Klein, W. H.** (1999). POU domain factor Brn-3b is essential for retinal ganglion cell differentiation and survival but not for initial cell fate specification. *Dev. Biol.* **210**, 469-480.
- Gan, L., Xiang, M., Zhou, L., Wagner, D. S., Klein, W. H. and Nathans, J.** (1996). POU domain factor Brn-3b is required for the development of a large set of retinal ganglion cells. *Proc. Natl. Acad. Sci. USA* **93**, 3920-3925.
- Gay, R. D., Dawson, S. J., Murphy, W. J., Russell, S. W. and Latchman, D. S.** (1998). Activation of the iNOS gene promoter by Brn-3 POU family transcription factors is dependent upon the octamer motif in the promoter. *Biochem. Biophys. Acta* **1443**, 315-322.
- Gerrero, M. R., McEvelly, R. J., Turner, E., Lin, C. R., O'Connell, S., Jenne, K. J., Hobbs, M. V. and Rosenfeld, M. G.** (1993). Brn-3.0: a POU-domain protein expressed in the sensory, immune, and endocrine systems that functions on elements distinct from known octamer motifs. *Proc. Natl. Acad. Sci. USA* **90**, 10841-10845.
- Gruber, C. A., Rhee, J. M., Gleiberman, A. and Turner, E. E.** (1997). POU domain factors of the Brn-3 class recognize functional DNA elements which are distinctive, symmetrical, and highly conserved in evolution. *Mol. Cell Biol.* **17**, 2391-2400.
- Hinds, J. W. and Hinds, P. L.** (1974). Early ganglion cell differentiation in the mouse retina: an electron microscopic analysis utilizing serial sections. *Dev. Biol.* **37**, 381-416.
- Huang, E. J., Liu, W., Fritsch, B., Bianchi, L. M., Reichardt, L. F. and Xiang, M.** (2001). Brn3a is a transcriptional regulator of soma size, target field innervation and axon pathfinding of inner ear sensory neurons. *Development* **128**, 2421-2432.
- Jin, Z., Zhang, J., Klar, A., Chedotal, A., Rao, Y., Cepko, C. L. and Bao, Z. Z.** (2003). Irx4-mediated regulation of Slit1 expression contributes to the definition of early axonal paths inside the retina. *Development* **130**, 1037-1048.
- Li, J. Y. and Joyner, A. L.** (2001). Otx2 and Gbx2 are required for refinement and not induction of mid-hindbrain gene expression. *Development* **128**, 4979-4991.
- Liu, W., Khare, S. L., Liang, X., Peters, M. A., Liu, X., Cepko, C. L. and Xiang, M.** (2000). All Brn3 genes can promote retinal ganglion cell differentiation in the chick. *Development* **127**, 3237-3247.
- McEvelly, R. J., Erkman, L., Luo, L., Sawchenko, P. E., Ryan, A. F. and Rosenfeld, M. G.** (1996). Requirement for Brn-3.0 in differentiation and survival of sensory and motor neurons. *Nature* **384**, 574-577.
- Mishina, Y., Suzuki, A., Ueno, N. and Behringer, R. R.** (1995). Bmpr encodes a type I bone morphogenetic protein receptor that is essential for gastrulation during mouse embryogenesis. *Genes Dev.* **9**, 3027-3037.
- Mu, X., Beremand, P. D., Zhao, S., Pershad, R., Sun, H., Scarpa, A., Liang, S., Thomas, T. L. and Klein, W. H.** (2004). Discrete gene sets depend on POU domain transcription factor Brn3b/Brn-3.2/POU4f2 for their expression in the mouse embryonic retina. *Development* **131**, 1197-1210.
- Ndisang, D., Morris, P. J., Chapman, C., Ho, L., Singer, A. and Latchman, D. S.** (1998). The HPV-activating cellular transcription factor Brn-3a is overexpressed in CIN3 cervical lesions. *J. Clin. Invest.* **101**, 1687-1692.
- Ninkina, N. N., Stevens, G. E., Wood, J. N. and Richardson, W. D.** (1993). A novel Brn3-like POU transcription factor expressed in subsets of rat sensory and spinal cord neurons. *Nucleic Acids Res.* **21**, 3175-3182.
- Nixon, R. A., Lewis, S. E., Dahl, D., Marotta, C. A. and Drager, U. C.** (1989). Early posttranslational modifications of the three neurofilament subunits in mouse retinal ganglion cells: neuronal sites and time course in relation to subunit polymerization and axonal transport. *Mol. Brain Res.* **5**, 93-108.
- Smith, M. D., Dawson, S. J. and Latchman, D. S.** (1997). The Brn-3a transcription factor induces neuronal process outgrowth and the coordinate expression of genes encoding synaptic proteins. *Mol. Cell Biol.* **17**, 345-354.
- Trieu, M., Rhee, J. M., Fedtsova, N. and Turner, E. E.** (1999). Autoregulatory sequences are revealed by complex stability screening of the mouse brn-3.0 locus. *J. Neurosci.* **19**, 6549-6558.
- Trieu, M., Ma, A., Eng, S. R., Fedtsova, N. and Turner, E. E.** (2003). Direct autoregulation and gene dosage compensation by POU-domain transcription factor Brn3a. *Development* **130**, 111-121.
- Turner, E. E., Jenne, K. J. and Rosenfeld, M. G.** (1994). Brn-3.2: a Brn-3-related transcription factor with distinctive central nervous system expression and regulation by retinoic acid. *Neuron* **12**, 205-218.
- Wang, S. W., Gan, L., Martin, S. E. and Klein, W. H.** (2000). Abnormal polarization and axon outgrowth in retinal ganglion cells lacking the POU-domain transcriptional factor Brn-3b. *Mol. Cell. Neurosci.* **15** (in press).
- Wang, S. W., Kim, B. S., Ding, K., Wang, H., Sun, D., Johnson, R. L., Klein, W. H. and Gan, L.** (2001). Requirement for math5 in the development of retinal ganglion cells. *Genes Dev.* **15**, 24-29.
- Wang, S. W., Mu, X., Bowers, W. J., Kim, D. S., Plas, D. J., Crair, M. C., Federoff, H. J., Gan, L. and Klein, W. H.** (2002). Brn3b/Brn3c double knockout mice reveal an unsuspected role for Brn3c in retinal ganglion cell axon outgrowth. *Development* **129**, 467-477.
- Wegner, M., Drolet, D. W. and Rosenfeld, M. G.** (1993). POU-domain proteins: structure and function of developmental regulators. *Curr. Opin. Cell Biol.* **5**, 488-498.
- Xiang, M.** (1998). Requirement for Brn-3b in early differentiation of postmitotic retinal ganglion cell precursors. *Dev. Biol.* **197**, 155-169.
- Xiang, M., Zhou, L., Peng, Y. W., Eddy, R. L., Shows, T. B. and Nathans, J.** (1993). Brn-3b: a POU domain gene expressed in a subset of retinal ganglion cells. *Neuron* **11**, 689-701.
- Xiang, M., Zhou, L., Macke, J. P., Yoshioka, T., Hendry, S. H., Eddy, R. L., Shows, T. B. and Nathans, J.** (1995). The Brn-3 family of POU-domain factors: primary structure, binding specificity, and expression in subsets of retinal ganglion cells and somatosensory neurons. *J. Neurosci.* **15**, 4762-4785.
- Xiang, M., Gan, L., Zhou, L., Klein, W. H. and Nathans, J.** (1996). Targeted deletion of the mouse POU domain gene Brn-3a causes selective loss of neurons in the brainstem and trigeminal ganglion, uncoordinated limb movement, and impaired suckling. *Proc. Natl. Acad. Sci. USA* **93**, 11950-11955.
- Xiang, M., Gan, L., Li, D., Chen, Z. Y., Zhou, L., O'Malley, B. W., Jr, Klein, W. and Nathans, J.** (1997a). Essential role of POU-domain factor Brn-3c in auditory and vestibular hair cell development. *Proc. Natl. Acad. Sci. USA* **94**, 9445-9450.
- Xiang, M., Gan, L., Li, D., Zhou, L., Chen, Z. Y., Wagner, D., O'Malley, B. W., Jr, Klein, W. and Nathans, J.** (1997b). Role of the Brn-3 family of POU-domain genes in the development of the auditory/vestibular, somatosensory, and visual systems. *Cold Spring Harb. Symp. Quant. Biol.* **62**, 325-336.
- Yang, Z., Ding, K., Pan, L., Deng, M. and Gan, L.** (2003). Math5 determines the competence state of retinal ganglion cell progenitors. *Dev. Biol.* **264**, 240-254.

- Young, R. W.** (1985). Cell differentiation in the retina of the mouse. *Anat. Rec.* **212**, 199-205.
- Zhang, F., Lu, C., Severin, C. and Sretavan, D. W.** (2000). GAP-43 mediates retinal axon interaction with lateral diencephalon cells during optic tract formation. *Development* **127**, 969-980.
